# Supplementary material
Source: PubMed Central journal article supplement (PMC8121698)
Supplement: mmc1.pdf [file mmc1.pdf]

## Supporting Information

### A novel anti-human IL-1R7 antibody reduces IL-18 mediated inflammatory signaling

Suzhao Li<sup>1,#\*</sup>, Liqiong Jiang<sup>1,2#</sup>, Karsten Beckmann<sup>3,7,#</sup>, Jesper Falkesgaard Højen<sup>4</sup>, Ulrich Pessara<sup>3</sup>, Nicholas E. Powers<sup>1</sup>, Dennis M. de Graaf<sup>1</sup>, Tania Azam<sup>1</sup>, Jared Lindenberger<sup>5</sup>, Elan Z. Eisenmesser<sup>6</sup>, Stephan Fischer<sup>3</sup>, and Charles A. Dinarello<sup>1,\*</sup>

<sup>1</sup>Department of Medicine, University of Colorado Denver Anschutz Medical Campus, Aurora, CO 80045, USA

<sup>2</sup>Shenzhen Eye Hospital, No.18 Zetian Road, Futian District, Shenzhen, Guangdong, China 518040

<sup>3</sup>MAB Discovery GmbH, Neuried, Germany

<sup>4</sup>Department of Infectious Diseases, Aarhus University Hospital, 8200 Aarhus N, Denmark

<sup>5</sup>Biophysics Core facility, University of Colorado Denver Anschutz Medical Campus, Aurora, CO, USA

<sup>6</sup>Department of Biochemistry and Molecular Genetics, University of Colorado Denver Anschutz Medical Campus, Aurora, CO 80045, USA

<sup>7</sup>Present address: BioNTech SE, An der Goldgrube 12, 55131 Mainz, Germany

<sup>#</sup>These authors contributed equally to this work.

\*To whom correspondence should be addressed: Suzhao Li and Charles A. Dinarello, Department of Medicine, University of Colorado Denver Anschutz Medical Campus, Aurora, Colorado 80045, USA,

Tel: 303-724-4920, Fax: 303 724-6178,

Email: [suzhao.li@cuanschutz.edu](mailto:suzhao.li@cuanschutz.edu), [cdinare333@aol.com](mailto:cdinare333@aol.com)

**Running title:** Anti-IL-1R7 suppresses IL-18 pathway

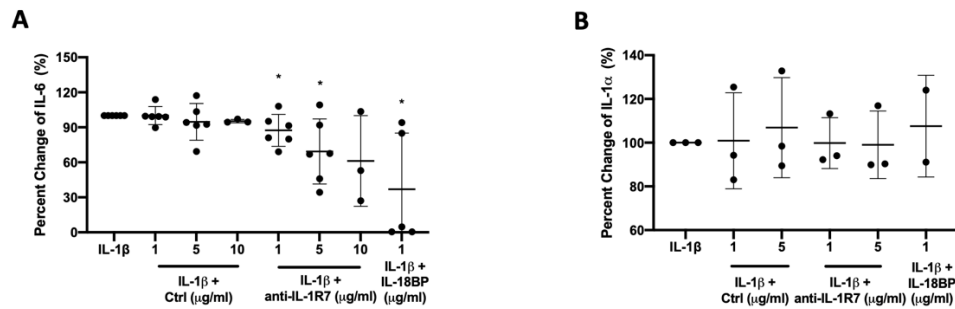

**Supplemental Figure 1. Effect of anti-IL-1R7 on IL-1 $\beta$ -induced IL-6 and intracellular IL-1 $\alpha$  in human lung epithelial A549-hIL-1R7 cell cultures.** Cells are pretreated with or without isotype control, anti-IL-1R7 or IL-18BP for at least 30 minutes before they were stimulated with 1ng/ml IL-1 $\beta$  for 24 hours. Mean  $\pm$  SD Percent change of IL-1 $\beta$ -induced cytokine production in human A549-hIL-1R7 cells with various concentrations of anti-IL-1R7 or its isotype control or IL-18BP (n  $\geq$ 3 except for IL-1 $\beta$  +IL-18BP induced IL-1 $\alpha$  where n=2 ). \*P < 0.05, compared with IL-1 $\beta$  alone.

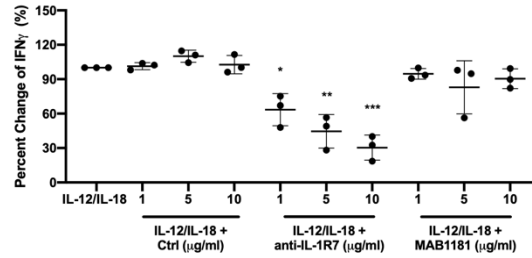

**Supplemental Figure 2. The effect of anti-IL-1R7 in comparison to the reference antibody MAB1181 on the IL-12/IL-18-induced IFN $\gamma$  in human PBMC cultures.** Cells are pretreated with or without Ctrl, anti-IL-1R7 or the reference antibody MAB1181 for at least 30 minutes before they were stimulated with 2ng IL-12+20ng/ml IL-18 for 24 hours. Mean  $\pm$  SD Percent change of IL-12/IL-18-induced IFN $\gamma$  production in PBMCs with various concentrations of anti-IL-1R7 or its isotype control or the reference antibody MAB1181 (n=3 for all conditions). \*\*\*P < 0.001, \*\*P < 0.01, \*P < 0.05 compared with IL-12/IL-18 alone.

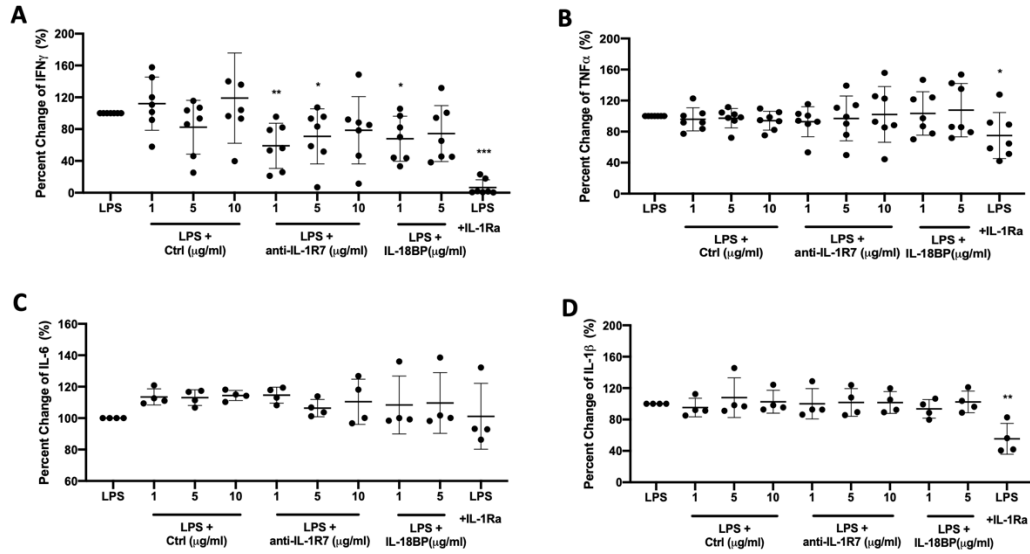

**Supplemental Figure 3. The effect of anti-IL-1R7 antibody on 3-day LPS-induced cytokine production in human PBMC culture.** Cells are pretreated with or without Ctrl, anti-IL-1R7 or IL-18BP or IL-1Ra for at least 30 minutes before they were stimulated with 10ng/ml LPS for 3 days. **(A)** Effect of anti-IL-1R7 on LPS-induced IFN $\gamma$  in PBMC culture. **(B)** Effect of anti-IL-1R7 on LPS-induced TNF $\alpha$  in PBMC culture. **(C)** Effect of anti-IL-1R7 on LPS-induced IL-6 in PBMC culture. **(D)** Effect of anti-IL-1R7 on LPS-induced IL-1 $\beta$  in PBMC culture. Mean  $\pm$  SD Percent change of LPS-induced cytokine production in PBMCs with various concentrations of anti-IL-1R7 or its isotype control or IL-18BP or IL-1Ra ( $n \geq 4$  for all conditions). \*\*\* $P < 0.001$ , \*\* $P < 0.01$ , and \* $P < 0.05$ , compared with LPS alone.

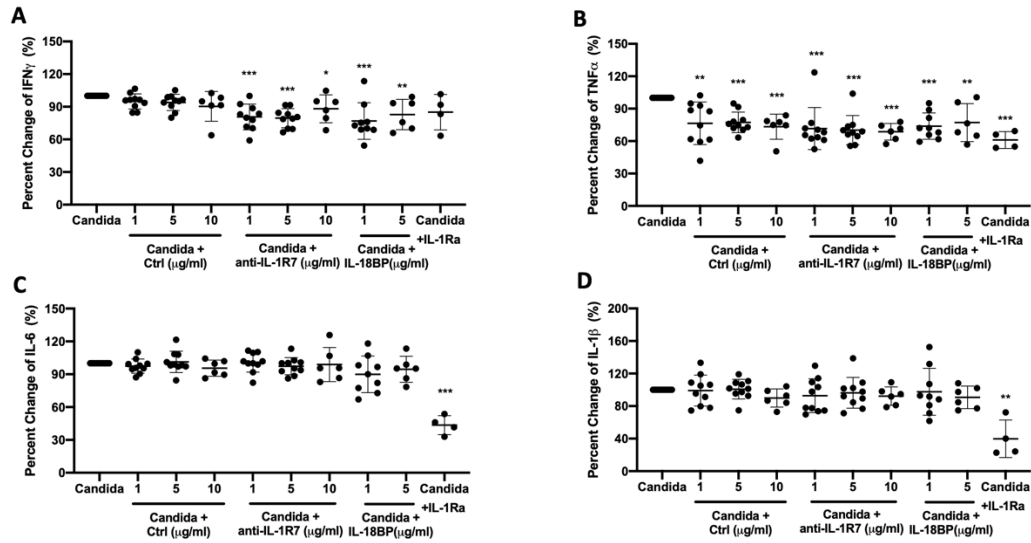

**Supplemental Figure 4. The effect of anti-IL-1R7 antibody on *Candida*-induced cytokine production in human PBMC culture.** Cells were pretreated with or without isotype control, anti-IL-1R7 or IL-18BP or IL-1Ra for at least 30 minutes before they were stimulated with 1:200 *Candida* for 3-5 days. **(A)** Effect of anti-IL-1R7 on *Candida*-induced IFN $\gamma$  in PBMC culture. **(B)** Effect of anti-IL-1R7 on *Candida*-induced TNF $\alpha$  in PBMC culture. **(C)** Effect of anti-IL-1R7 on *Candida*-induced IL-6 in PBMC culture. **(D)** Effect of anti-IL-1R7 on *Candida*-induced IL-1 $\beta$  in PBMC culture. Mean  $\pm$  SD Percent change of *Candida*-induced cytokine production in PBMCs with various concentrations of anti-IL-1R7 or its isotype control or IL-18BP or IL-1Ra ( $n \geq 4$  for all conditions). \*\*\* $P < 0.001$ , \*\* $P < 0.01$ , and \* $P < 0.05$ , compared with *Candida* alone.

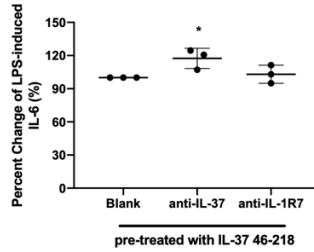

**Supplemental Figure 5. The effect of anti-IL-1R7 in comparison to the monoclonal anti-IL-37 antibody on IL-37-regulated IL-6 production in LPS-stimulated PBMC.** Cells were pretreated for 1 hour with Blank (RPMI medium premixed with 1ng/ml recombinant IL-37 46-218), or anti-IL-37 premixed with recombinant IL-37 46-218, or anti-IL-1R7 premixed with recombinant IL-37 46-218 before they were stimulated with 10ng/ml LPS for 24 hours. Mean  $\pm$  SD Percent change of LPS-induced IL-6 production in PBMCs in the presence of 1ng/ml recombinant IL-37 pretreated with or without 1 $\mu$ g/ml anti-IL-1R7 or anti-IL-37 monoclonal antibodies (n=3 for all conditions). \*P < 0.05 compared with Blank (IL-37 pretreatment alone).

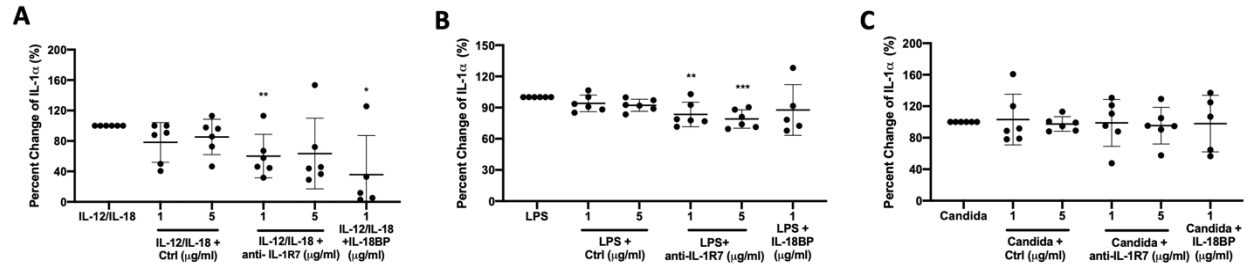

**Supplemental Figure 6. Effect of anti-IL-1R7 on various stimuli-induced intracellular IL-1 $\alpha$  production in PBMC cultures.** Cells were pretreated with or without isotype control, anti-IL-1R7 or IL-18BP for at least 30 minutes before they were stimulated with (A) 2ng/ml IL-12+20ng/ml IL-18 or (B) 10ng/ml LPS or (C) 1:200 *Candida* for 1-5 days as indicated in *Experimental Procedures*. Mean  $\pm$  SD Percent change of the corresponding stimulus-induced intracellular IL-1 $\alpha$  production in PBMC with various concentrations of anti-IL-1R7 or its isotype control or IL-18BP ( $n \geq 5$ ). \*\*\* $P < 0.001$ , \*\* $P < 0.01$ , and \* $P < 0.05$ , compared with the corresponding stimulus alone.
